# Supplementary material for: Magnetic resonance T1w/T2w ratio and voxel-based morphometry in multiple system atrophy
Source: PubMed Central journal article supplement (PMC8569168; doi:10.1038/s41598-021-01222-5), 2021-11-04
Supplement: 41598_2021_1222_MOESM1_ESM.pdf [file 41598_2021_1222_MOESM1_ESM.pdf]

# Magnetic resonance T1w/T2w ratio and voxel-based morphometry in multiple system atrophy

Ponticorvo S,<sup>1</sup> Manara R,<sup>2</sup> Russillo MC,<sup>1</sup> Erro R,<sup>1</sup> Picillo M,<sup>1</sup> Di Salle G,<sup>3</sup> Di Salle F,<sup>1</sup> Barone P,<sup>1</sup> Esposito F,<sup>4</sup> Pellecchia MT<sup>1</sup>

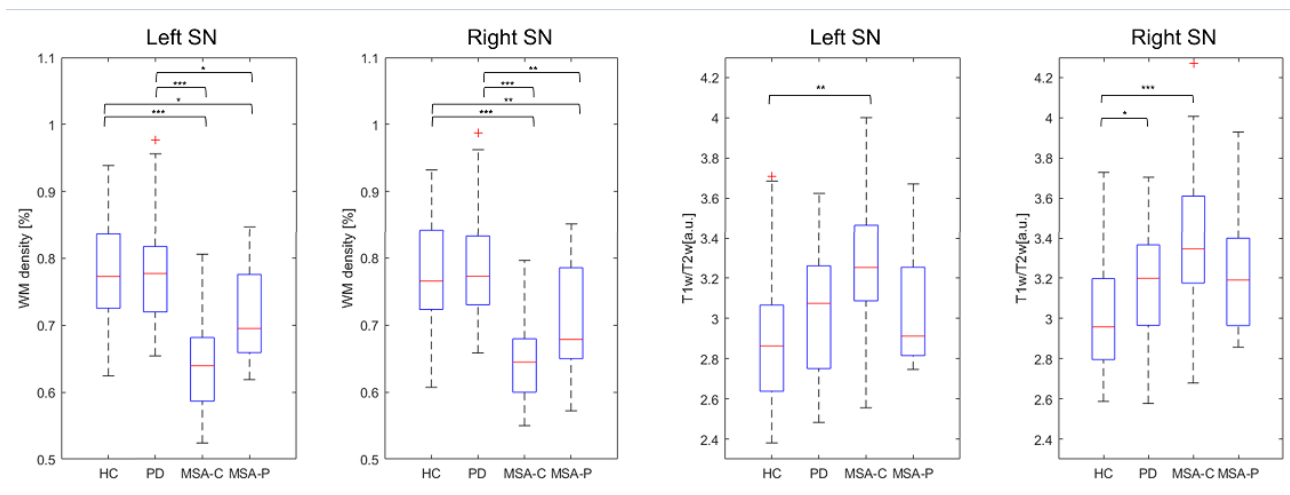

Supplementary Figure 1. Box-plots of the WM density (first and second boxes) and T1w/T2w (third and fourth boxes) regional mean values distribution in the bilateral substantia nigra pars compacta (SN) for each group. Significant differences are indicated with asterisks (\*p<0.05, \*\*p<0.01).
